# Supplementary material
Source: PubMed Central journal article supplement (PMC4396481)
Supplement: JCI78941sd.pdf [file JCI78941sd.pdf]

# Supplemental Figure 1

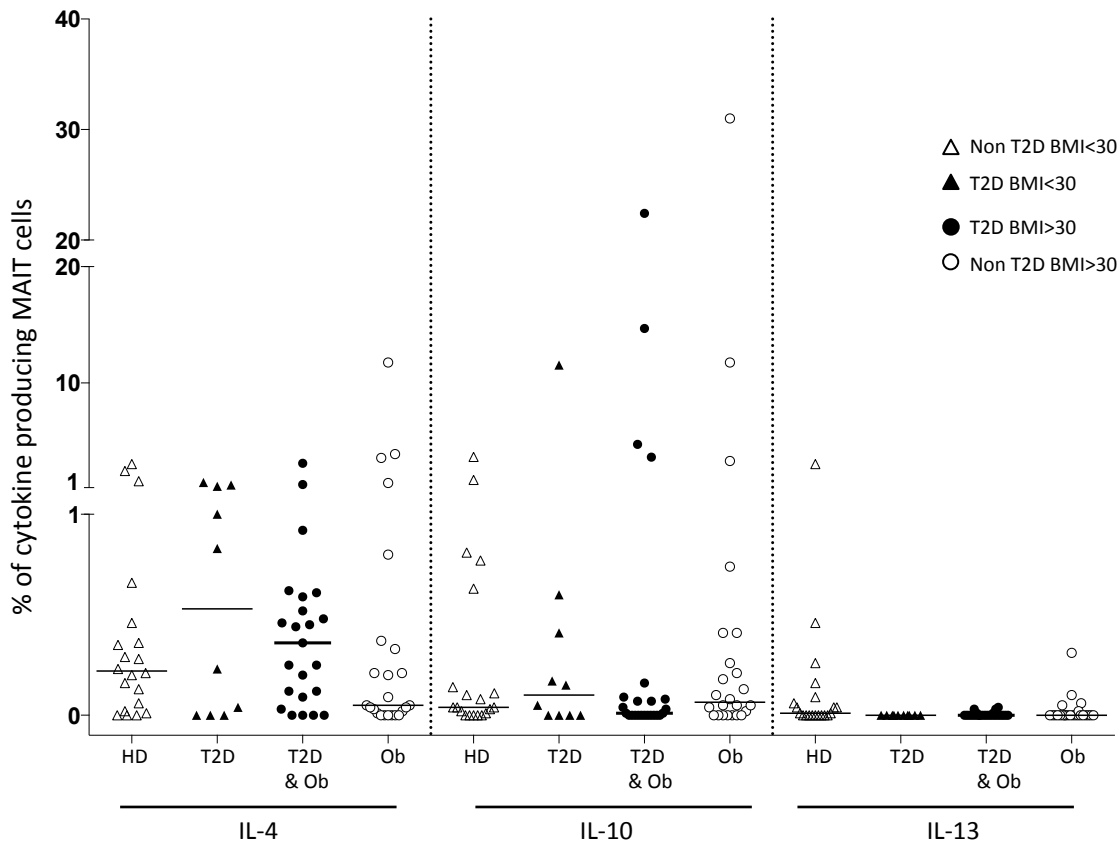

**Supplemental Figure 1. Cytokine production by circulating MAIT cells in T2D and severe obese patients.** Analysis of circulating MAIT cell cytokine production by flow cytometry, after PMA-ionomycin stimulation in healthy donors (n=20), T2D non obese (n=10), T2D obese (n=23), and obese non T2D patients (n=24). Mann Whitney test.

## Supplemental Figure 2

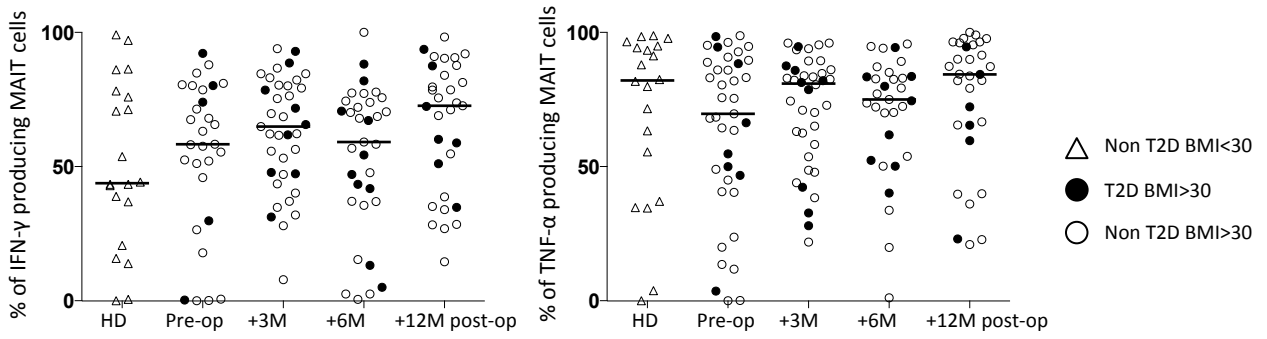

**Supplemental Figure 2. Impact of bariatric surgery.** Cytokine production after PMA-  
ionomycin stimulation of MAIT cells from healthy donors (n=20) and obese patients before  
surgery (n=39) and 3, 6 and 12 months post-surgery (n=38, n=33, and n=31,  
respectively). Mann Whitney test.

# Supplemental Figure 3

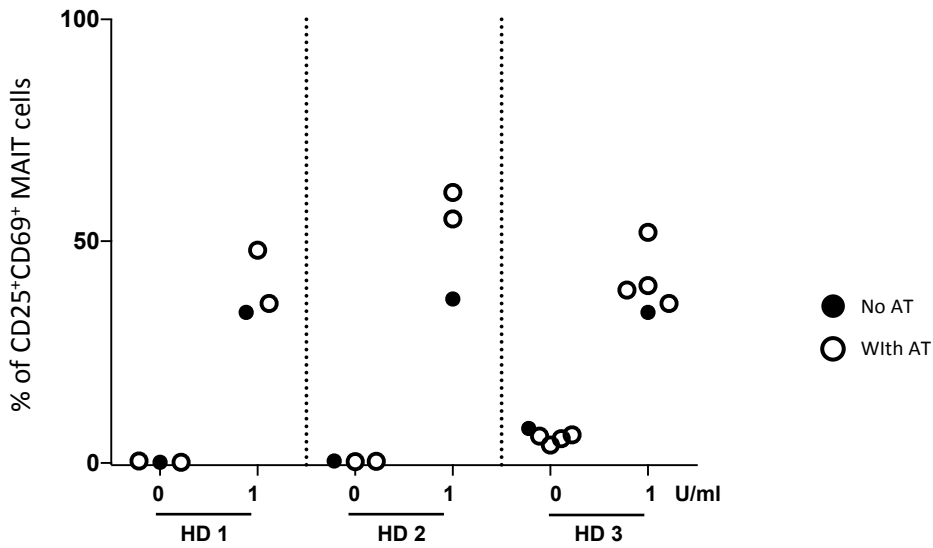

**Supplemental Figure 3. Increased MAIT cells activation in presence of AT.** PBMCs from 3 healthy donors were co-cultured with AT for 24h, followed by stimulation for 48h with MAIT ligand (0-1U/ml) and flow cytometric analysis in MAIT cells of CD25 and CD69 co-expression.

---

**Supplemental Table 1. Additional control individuals and obese patients from which blood or OM AT biopsies were analyzed**

|                                | <b>Controls (blood)</b> | <b>Obese (blood)</b> | <b>Obese (OM AT)</b> |
|--------------------------------|-------------------------|----------------------|----------------------|
| <b>n</b>                       | 15                      | 20                   | 13                   |
| <b>Age (year)*</b>             | 36.2 ± 3.6              | 54.6 ± 2.4           | 43.1 ± 2.3           |
| <b>Sex F/M</b>                 | 8/7                     | 12/8                 | 11/2                 |
| <b>BMI (kg/m<sup>2</sup>)*</b> | 21 ± 0.5                | 31.4 ± 0.9           | 45.1 ± 1.9           |

\* Means ± SEM.

---
